# Supplementary material for: Facial morphological characteristics of mouth breathers vs. nasal breathers: A systematic review and meta-analysis of lateral cephalometric data
Source: PubMed Central journal article supplement — Exp Ther Med. 2020 Mar 19;19(6):3738–50. doi: 10.3892/etm.2020.8611 (PMC7185155; doi:10.3892/etm.2020.8611), 2020-03-19
Supplement: Supplementary_Data.pdf [file Supplementary_Data.pdf]

Table SI. Search strategy used for electronic search.

| Search | Query                                                                    | Items found <sup>a</sup> |
|--------|--------------------------------------------------------------------------|--------------------------|
| 1      | Search Nasal breathers                                                   | 209                      |
| 2      | Search Mouth breathers                                                   | 188                      |
| 3      | Search (Nasal breathers) AND Cephalometric                               | 31                       |
| 4      | Search (Mouth breathers) AND Cephalometric                               | 33                       |
| 5      | Search [(Mouth breathers) OR Nasal breathers] AND Skeletal               | 17                       |
| 6      | Search [(Mouth breathers) OR Nasal breathers] AND Dentofacial            | 23                       |
| 7      | Search [(Mouth breathers) OR Nasal breathers] AND Malocclusion           | 34                       |
| 8      | Search [(Mouth breathers) OR Nasal breathers] AND Growth pattern         | 16                       |
| 9      | Search [(Mouth breathers) OR Nasal breathers] AND Facial characteristics | 8                        |
| 10     | Search [(Mouth breathers) OR Nasal breathers] AND facial morphology      | 54                       |
| 11     | Search (Mouth breathers) OR Nasal breathers                              | 245                      |

<sup>a</sup>Results shown for PubMed search.
